# Supplementary material for: Synthesis of one-dimensional Bi2O3–Bi5O7I heterojunctions with high interface quality
Source: Royal Society of Chemistry journal article supplement (doi:10.1039/c8ce00819a), 2018-01-01
Supplement: c8ce00819a1.pdf [file c8ce00819a1.pdf]

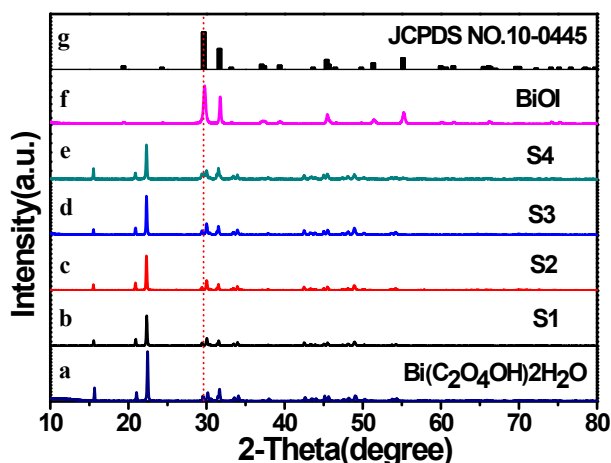

**Figure S1.** The XRD patterns of the precursors, (a)  $\text{Bi}(\text{OHC}_2\text{O}_4)_2 \cdot 2\text{H}_2\text{O}$ , (b) S-1, (c) S-2, (d) S-3 (e) S-4 (f) BiOI and (g) Standard Card of BiOI

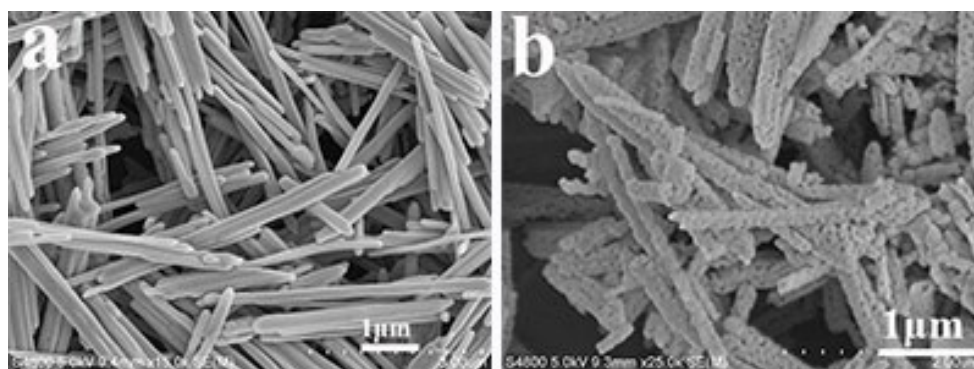

**Figure S2** FE-SEM images of the  $\text{Bi}(\text{OHC}_2\text{O}_4)_2 \cdot 2\text{H}_2\text{O}$  (a),  $\text{Bi}_2\text{O}_3$  (b).

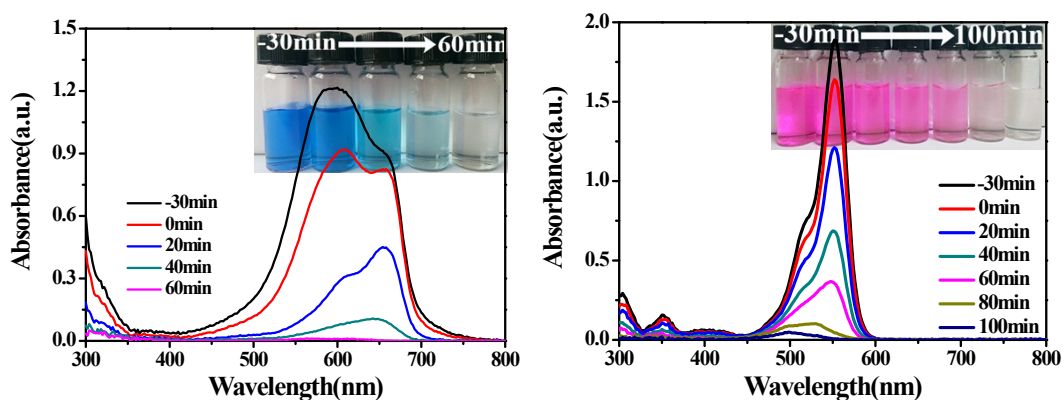

**Figure S3** UV-vis absorption spectra of (a) MB (10 mg/L) and (b) RhB (10mg/L) using DS-2 as photocatalyst under visible light irradiation.
